# Supplementary material for: Multi-Block Copolymer Membranes Consisting of Sulfonated Poly(p-phenylene) and Naphthalene Containing Poly(arylene Ether Ketone) for Proton Exchange Membrane Water Electrolysis
Source: MDPI journal article supplement (doi:10.3390/polym15071748), 2023-03-31
Supplement: s1 [file s1]

Supplementary Information

# Multi-block copolymer membranes consisting of sulfonated poly(*p*-phenylene) and naphthalene containing poly(arylene ether ketone) for proton exchange membrane water electrolysis

Eui Jin Ko <sup>1,†</sup>, Eunju Lee <sup>1,2,†</sup>, Jang Yong Lee <sup>1</sup>, Duk Man Yu <sup>1</sup>, Sang Jun Yoon <sup>1</sup>, Keun-Hwan Oh <sup>1,\*</sup>, Young Taik Hong <sup>1,\*</sup>, and Soonyong So <sup>1,\*</sup>

<sup>1</sup> Energy Materials Research Center, Korea Research Institute of Chemical Technology (KRICT), Daejeon 34114, South Korea; ljylee@kRICT.re.kr (J.Y.L.); dmyu@kRICT.re.kr (D.M.Y.); sjyoon@kRICT.re.kr (S.J.Y.); khoh@kRICT.re.kr (K.H.O.), ythong@kRICT.re.kr (Y. T. H.), syso@kRICT.re.kr (S.S.)

<sup>2</sup> Department of Polymer Engineering, Chungnam National University, Daejeon 34134, South Korea; hwanyep@kRICT.re.kr (E.L.)

\* Correspondence: khoh@kRICT.re.kr (K.H.O.); ythong@kRICT.re.kr (Y. T. H.); syso@kRICT.re.kr (S.S.)

† These authors contributed equally to this work

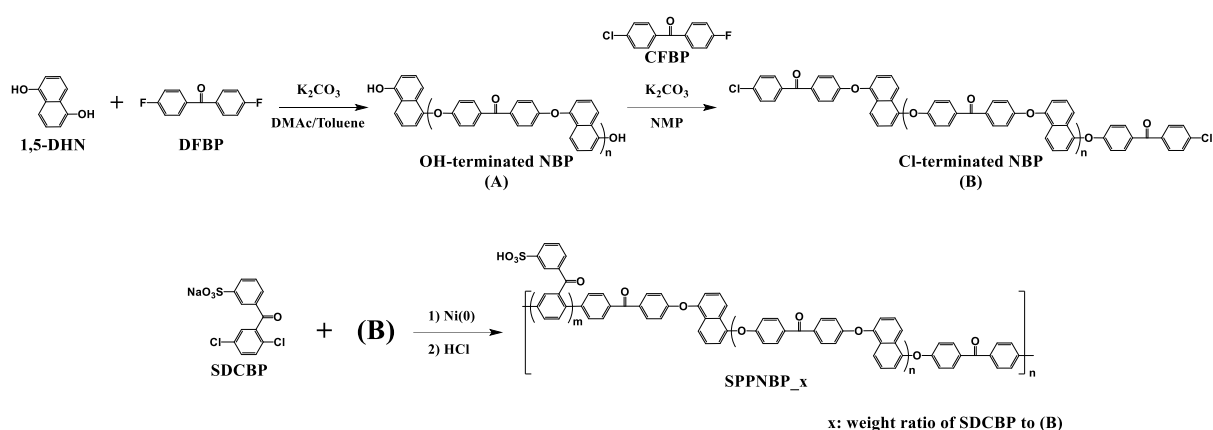

**Scheme S1.** Synthesis procedure of OH-terminated NBP (A), Cl-terminated NBP (B) and SPPNBP copolymers.

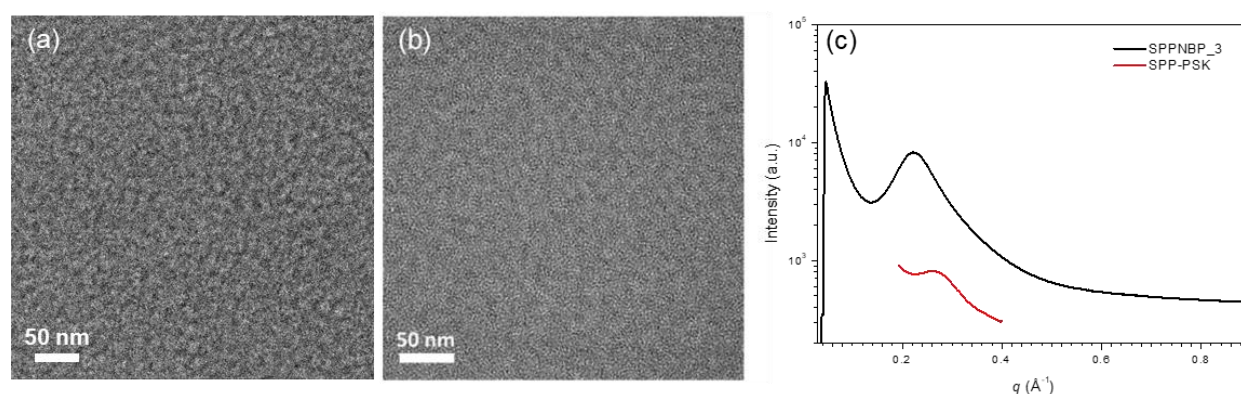

**Figure S1.** TEM images of (a) SPPNBP\_3 and (b) SPP-PSK membranes, and (c) SAXS intensity profiles of SPPNBP\_3 and SPP-PSK copolymers. (b) and (c) are reproduced from ref [1]. Copyright 2019 ACS.

**Table S1.** The IEC values of SPPNBP membranes through the titration and  $^1\text{H}$  NMR methods.

|          | IEC (meq g <sup>-1</sup> ) |                               |                               | Ratio <sup>c</sup> (%) |
|----------|----------------------------|-------------------------------|-------------------------------|------------------------|
|          | Titration <sup>a</sup>     | $^1\text{H}$ NMR <sup>a</sup> | $^1\text{H}$ NMR <sup>b</sup> |                        |
| SPPNBP_1 | 1.10                       | 0.85                          | 1.08                          | 27.1                   |
| SPPNBP_3 | 2.05                       | 1.46                          | 1.23                          | -15.8                  |
| SPPNBP_5 | 2.49                       | 1.73                          | 1.46                          | -15.6                  |
| SPPNBP_7 | 2.06                       | 1.50                          | 1.23                          | -18.0                  |

<sup>a</sup> The values before the Fenton's test.

<sup>b</sup> The values after the Fenton's test.

<sup>c</sup> Ratio (%) =  $(\text{IEC}_{\text{after}} - \text{IEC}_{\text{before}}) / \text{IEC}_{\text{before}} \times 100$  (%)

- Hong, S. H.; Cha, M. S.; Hong, S.-K.; Oh, S.-G.; Lee, J. Y. Structural Effect of the Hydrophobic Block on the Chemical Stability of Ion-Conducting Multiblock Copolymers for Flow Battery. *ACS Sustain. Chem. Eng.* 2019, 7 (20), 17088–17099. <https://doi.org/10.1021/acssuschemeng.9b03182>.
